# Supplementary material for: Binder effect on the battery performance of mesoporous copper ferrite nanoparticles with grain boundaries as anode materials
Source: Royal Society of Chemistry journal article supplement (doi:10.1039/c4ra06673a), 2014-08-19
Supplement: c4ra06673a1.pdf [file c4ra06673a1.pdf]

## Supplementary data

### **Binder effect on the battery performance of mesoporous copper ferrite nanoparticles with grain boundaries as anode materials**

R. Indhrajothi<sup>1</sup>, I. Prakash<sup>2</sup>, M. Venkateswarlu<sup>3</sup>, N. Satyanarayana<sup>1\*</sup>

1. Department of Physics, Pondicherry University, Puducherry 605 014, India.

E-mail: nallanis2011@gmail.com, Tel: +91-413-2654404

2 School of Electrical and Electronics Engineering, SASTRA University, Thanjavur 613 401, Tamilnadu, India.

3. R & D, Amara Raja Batteries Ltd, Tirupati 517 520 A.P, India

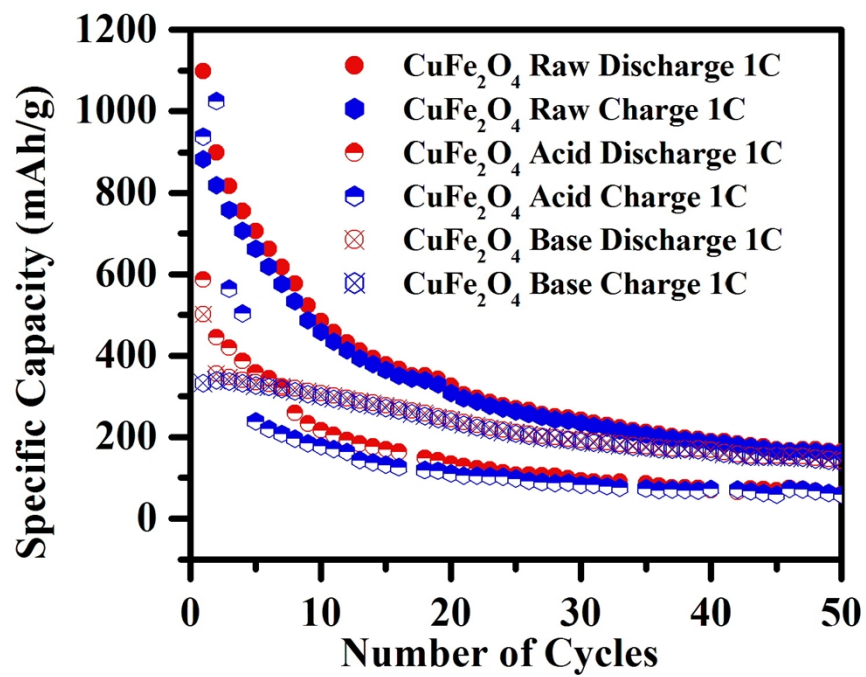

**Figure S1.** Specific capacity Vs. number of cycles for  $\text{CuFe}_2\text{O}_4$  raw, acid and base samples obtained at 623 K with alginate binder cycled at 1C rate.
